# Supplementary material
Source: publisher figshare collection journal article supplement (https://acs.figshare.com/ndownloader/files/5123581)
Supplement: Supplementary file 1 [file 5123581]

**Appendix I:** Thermodynamic model for the calcium-dependent interaction of a subunit of S100B with a target protein.

The complete description of the thermodynamic equilibria describing the calcium-dependent interaction of a subunit of S100B with a target protein is shown (Figure 1S) with the 13 possible dissociation constants defined as follows:

$$\begin{aligned}
 K_I &= [A][M]/[AM_I] \\
 K_{II} &= [A][M]/[AM_{II}] \\
 K_{III} &= [AM_I][M]/[AM_{I,II}] \\
 K_{IV} &= [AM_{II}][M]/[AM_{I,II}] \\
 K_V &= [AM_I][S]/[AM_I S] \\
 K_{VI} &= [AM_I S][M]/[AM_{I,II} S] \\
 K_{VII} &= [AM_{II}][S]/[AM_{II} S] \\
 K_{VIII} &= [AM_{I,II}][S]/[AM_{I,II} S] \\
 K_{IX} &= [AM_{II} S][M]/[AM_{I,II} S] \\
 K_X &= [BM_{II}][S]/[BM_{II} S] \\
 K_{XI} &= [BM_{II}][M]/[BM_{I,II}] \\
 K_{XII} &= [BM_{I,II}][S]/[BM_{I,II} S] \\
 K_{XIII} &= [BM_{II} S][M]/[BM_{I,II} S]
 \end{aligned}$$

where A=S100B prior to the 90° re-orientation of helix three of S100B (I, 2); B = S100B after 90° re-orientation of helix three (I, 2); M<sub>I</sub> = a Ca<sup>2+</sup> ion bound to EF Hand I (pseudo EF-hand); M<sub>II</sub> = a Ca<sup>2+</sup> ion bound to EF Hand II (typical EF-hand); M<sub>I,II</sub> = Ca<sup>2+</sup> ions bound to EF Hand I and EF Hand II; S = free target protein (i.e. p53); L<sub>I</sub> to L<sub>IV</sub> represent the four possible conformational changes; and M = free Ca<sup>2+</sup>.

The pseudo EF-hand binds calcium with lower affinity such that K<sub>I</sub> and K<sub>IV</sub> >> K<sub>II</sub>. Therefore, K<sub>I</sub>, K<sub>III</sub>, K<sub>IV</sub>, K<sub>V</sub>, K<sub>VI</sub>, K<sub>VIII</sub>, L<sub>II</sub> and L<sub>III</sub> can be ignored. Likewise, K<sub>IX</sub>, K<sub>XI</sub>, K<sub>XII</sub>, and K<sub>XIII</sub> are not significantly occupied at low calcium concentrations due to the weak calcium-binding affinity of the pseudo EF-hand. This assumption provides a simplified model (Figure 2S; illustrated in bold) with four predominant states (A, AM<sub>II</sub>, AM<sub>II</sub>S, BM<sub>II</sub>, and BM<sub>II</sub>S), three equilibria (K<sub>II</sub>, K<sub>VII</sub>, and K<sub>X</sub>), and two conformational changes L<sub>I</sub>, L<sub>IV</sub> where K<sub>VII</sub>·L<sub>IV</sub> = L<sub>I</sub>·K<sub>X</sub>.

**References**

- (1) Drohat, A. C., Baldisseri, D. M., Rustandi, R. R., and Weber, D. J. (1998) Solution structure of calcium-bound rat S100B(ββ) as determined by NMR spectroscopy. *Biochemistry* 37, 2729-2740.
- (2) Weber, D. J., Rustandi, R. R., Carrier, F., and Zimmer, D. B. (2000) *Interaction of dimeric S100B(ββ) with the tumor suppressor protein: A model for Ca-dependent S100-target protein interactions*, Kluwer Academic Publishers, Dordrecht, The Netherlands.

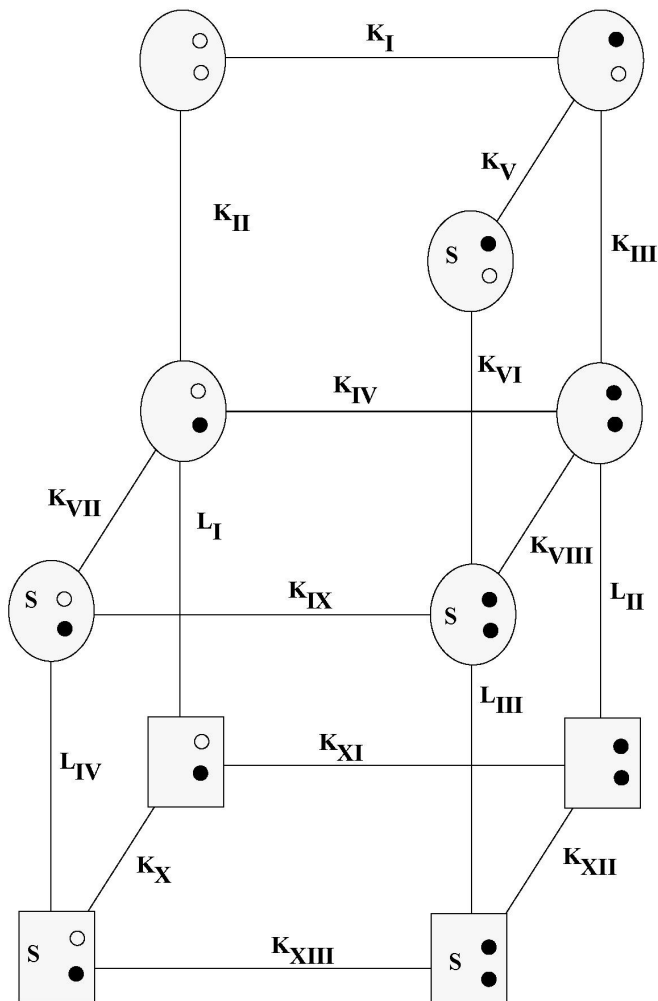

**Figure 1S:** Thermodynamic model for the calcium-dependent interaction of S100B with a target protein such as p53. Ovals represent S100B prior to the large reorientation of helix 3. After the conformational change (L), S100B is represented as a square. Binding of calcium to the pseudo EF-hand is represented by a filled circle (top) and binding of calcium to the typical EF-hand is represented by a filled circle (bottom). Open circles represent the same two calcium binding sites in the free state, respectively. A target protein, such as p53, is represented by the letter S. Overall, the calcium-dependent interaction of S100B with target proteins involves 13 equilibrium constants ( $K_I$  to  $K_{XIII}$ ), 11 states, and 4 conformational changes ( $L_I$ - $L_{IV}$ ).

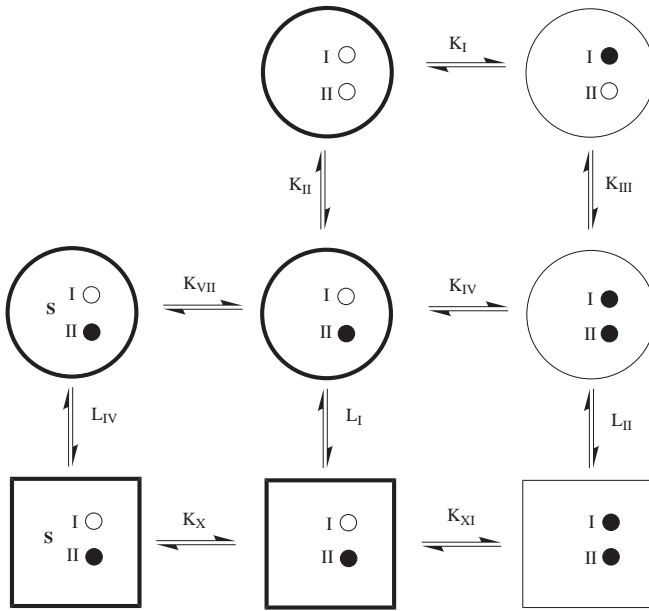

Figure 2S: A simplified model for the calcium-dependent interaction of wild-type S100B with a target protein. The pathway in bold shows five states (A,  $AM_{II}$ ,  $AM_{II}S$ ,  $BM_{II}$ , and  $BM_{II}S$ ), three equilibria ( $K_{II}$ ,  $K_{VII}$ , and  $K_X$ ), and two conformational changes  $L_I$ ,  $L_{IV}$  that are predominant at low calcium concentrations. The minor pathways and lower occupied states (i.e. those not in bold) are illustrated for comparison to other calcium-binding proteins (Figure 8).
